# Supplementary material
Source: Springer Nature journal article supplement (https://www.springermedizin.de/resource/supplementary/12905_2013_393_MOESM1_ESM.pdf/9518672)
Supplement: MOESM1 [file 9518672]

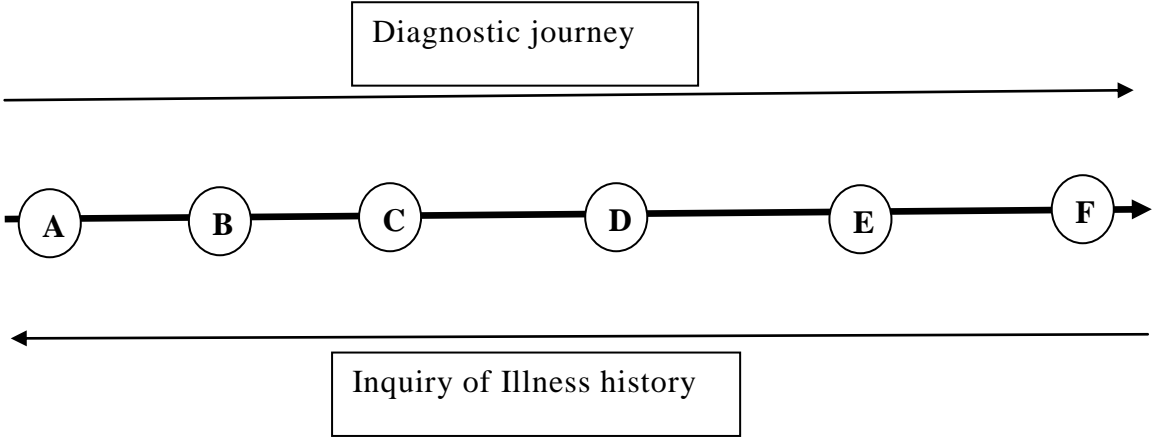

A= Date of symptom experienced by women (onset of symptoms)

B= Date of first contact with HCP

C= Date of referral by HCP to diagnostic center

D= Date of first visit to diagnostic center

E= Date of diagnosis

F= Date of treatment initiation

B-A = Patient delay

C- B= HCP delay

D-C= Referral delay

E-D = Diagnostic waiting time

E-A= Total diagnostic delay
